# Supplementary material for: Detecting chromosomal interactions in Capture Hi-C data with CHiCAGO and companion tools
Source: Springer Nature journal article supplement (doi:10.1038/s41596-021-00567-5), 2021-08-09
Supplement: MOESM1 [file 41596_2021_567_MOESM1_ESM14.pdf]

---

## Supplementary information

---

# Detecting chromosomal interactions in Capture Hi-C data with CHiCAGO and companion tools

---

In the format provided by the  
authors and unedited

---

## Supplementary information

---

# Detecting chromosomal interactions in Capture Hi-C data with CHiCAGO and companion tools

---

In the format provided by the  
authors and unedited

**Supplementary Table 1. Description of CHiCAGO functions.**

| Function                  | Description                                                                                                                                                                                                                                                                                                   | Parameters    |                                                                                                                                                                                                                                      |
|---------------------------|---------------------------------------------------------------------------------------------------------------------------------------------------------------------------------------------------------------------------------------------------------------------------------------------------------------|---------------|--------------------------------------------------------------------------------------------------------------------------------------------------------------------------------------------------------------------------------------|
| chicagoPipeline           | Runs data through the CHiCAGO pipeline.                                                                                                                                                                                                                                                                       | cd            | chicagoData object                                                                                                                                                                                                                   |
|                           |                                                                                                                                                                                                                                                                                                               | outprefix     | NULL, or a character string. If NULL, diagnostic plots are outputted to the current plotting device. If a character string, then pdfs will be generated for a series of diagnostic plots, in files of form "[outprefix]_[plotname]". |
|                           |                                                                                                                                                                                                                                                                                                               | printMemory   | Set to TRUE for memory diagnostics.                                                                                                                                                                                                  |
| copyCD                    | Copies a chicagoData object.                                                                                                                                                                                                                                                                                  | cd            | chicagoData object                                                                                                                                                                                                                   |
| defaultSettings           | Returns the default settings used for a CHiCAGO experiment.                                                                                                                                                                                                                                                   | NA            |                                                                                                                                                                                                                                      |
| estimateBrownianComponent | Estimates the dispersion, and adds a Bmean column giving the expected number of Brownian reads. Usually, the dispersion is calculated on a subsample of baits. Its size is taken from brownianNoise.subset. To use the entire dataset set this to NA.                                                         | cd            | chicagoData object                                                                                                                                                                                                                   |
| estimateDistFun           | Estimates the function describing how the expected number of counts decreases with increasing distance. Default Settings:<br>- 75 distance bins<br>- a cubic fit.<br>For distances outside of the bin boundaries, the function is log-linear, with continuity of f and its first derivative on the log-scale. | cd            | chicagoData object                                                                                                                                                                                                                   |
|                           |                                                                                                                                                                                                                                                                                                               | method        | Choice of method: "cubic" fits a cubic function with linear extrapolation, on a log-log scale.                                                                                                                                       |
|                           |                                                                                                                                                                                                                                                                                                               | plot          | Logical – if TRUE output a diagnostic plot.                                                                                                                                                                                          |
|                           |                                                                                                                                                                                                                                                                                                               | outfile       | Optional file name to save plot on disk.                                                                                                                                                                                             |
| estimateTechnicalNoise    | Calculates the expected technical noise based on trans read pairs.                                                                                                                                                                                                                                            | cd            | chicagoData object                                                                                                                                                                                                                   |
|                           |                                                                                                                                                                                                                                                                                                               | plot          | Logical - if TRUE output a diagnostic plot.                                                                                                                                                                                          |
|                           |                                                                                                                                                                                                                                                                                                               | outfile       | Optional file name to save plot on disk.                                                                                                                                                                                             |
| exportResults             | Exports the results from a chicagoData object to disk, or to a Genomic Interactions object.                                                                                                                                                                                                                   | cd            | chicagoData object                                                                                                                                                                                                                   |
|                           |                                                                                                                                                                                                                                                                                                               | outfileprefix | Prefix for output files.                                                                                                                                                                                                             |
|                           |                                                                                                                                                                                                                                                                                                               | scoreCol      | Column of intData(cd) that contains the score.                                                                                                                                                                                       |
|                           |                                                                                                                                                                                                                                                                                                               | cutoff        | The score cutoff.                                                                                                                                                                                                                    |
|                           |                                                                                                                                                                                                                                                                                                               | b2bcutoff     | Optional alternative score cutoff for bait-to-bait interactions.                                                                                                                                                                     |

|                |                                                                                                |                |                                                                                                                                                                                                                                                                     |
|----------------|------------------------------------------------------------------------------------------------|----------------|---------------------------------------------------------------------------------------------------------------------------------------------------------------------------------------------------------------------------------------------------------------------|
|                |                                                                                                | format         | File format(s) to output. If multiple formats are supplied as a vector, then all of these formats will be outputted. Supported formats are: "seqMonk", "interBed", "washU_text" and "washU_track" (advanced users).                                                 |
|                |                                                                                                | order          | Option to ordered by position or by score.                                                                                                                                                                                                                          |
|                |                                                                                                | removeMT       | Logical – if TRUE, discards interactions with mitochondrial DNA.                                                                                                                                                                                                    |
| getPvals       | Calculates a P-value for each observation using a Delaporte model                              | cd             | chicagoData object                                                                                                                                                                                                                                                  |
| getScores      | Converts p-values into CHiCAGO scores, using p-value weighting.                                | cd             | chicagoData object                                                                                                                                                                                                                                                  |
|                |                                                                                                | method         | Either "unweighted" or "weightedRelative" (recommended).                                                                                                                                                                                                            |
|                |                                                                                                | includeTrans   | Logical – if FALSE, discards trans interactions.                                                                                                                                                                                                                    |
|                |                                                                                                | plot           | Plot a diagnostic plot.                                                                                                                                                                                                                                             |
|                |                                                                                                | outfile        | Optional file name to save plot on disk.                                                                                                                                                                                                                            |
| getSkOnly      | Finds s_k scaling factors for multiple samples.                                                | files          | Path to .chinput files                                                                                                                                                                                                                                              |
|                |                                                                                                | cd             | Blank chicagoData object for reference, usually created with setExperiment.                                                                                                                                                                                         |
| mergeSamples   | Merges several chicagoData objects together, summarising their counts into a normalised value. | cdl            | List of chicagoData objects.                                                                                                                                                                                                                                        |
|                |                                                                                                | normalise      | Logical – if TRUE, uses the normalisation procedure specified by mergeMethod; if FALSE, takes the mean number of reads.                                                                                                                                             |
|                |                                                                                                | NcolOut        | Column identifying normalised counts.                                                                                                                                                                                                                               |
|                |                                                                                                | NcolNormPrefix | Column prefix for sample specific normalised counts.                                                                                                                                                                                                                |
|                |                                                                                                | mergeMethod    | Options:<br>- "weightedMean" - NcolOut is the weighted mean of the sample-wise counts adjusted by the samples' respective scaling factors s_k;<br>- "mean" - sample-specific counts are first normalised by dividing by s_k, and NcolOut is computed as their mean. |
|                |                                                                                                | repNormCounts  | Report normalised counts for each replicate This option is on by default when mergeMethod = "mean" but it is also available with "weightedMean".                                                                                                                    |
| modifySettings | Modifies the settings in a chicagoData object.                                                 | cd             | chicagoData object.                                                                                                                                                                                                                                                 |
|                |                                                                                                | designDir      | Path to designDir.                                                                                                                                                                                                                                                  |
|                |                                                                                                | settings       | Named list with settings.                                                                                                                                                                                                                                           |

|                         |                                                                                                                                                                                                                                                                                                                                                                                                                                                               |                   |                                                                                                                                                                                                                  |
|-------------------------|---------------------------------------------------------------------------------------------------------------------------------------------------------------------------------------------------------------------------------------------------------------------------------------------------------------------------------------------------------------------------------------------------------------------------------------------------------------|-------------------|------------------------------------------------------------------------------------------------------------------------------------------------------------------------------------------------------------------|
|                         |                                                                                                                                                                                                                                                                                                                                                                                                                                                               | settingsFile      | Path to a settings file. One row per setting: <name> <whitespace> <value>.                                                                                                                                       |
| normaliseBaits          | Calculate normalisation factors $s_j$ for each bait.                                                                                                                                                                                                                                                                                                                                                                                                          | cd                | chicagoData object                                                                                                                                                                                               |
|                         |                                                                                                                                                                                                                                                                                                                                                                                                                                                               | normNcol          | Column identifying normalised counts.                                                                                                                                                                            |
|                         |                                                                                                                                                                                                                                                                                                                                                                                                                                                               | plot              | Logical – if TRUE, output a diagnostic plot.                                                                                                                                                                     |
|                         |                                                                                                                                                                                                                                                                                                                                                                                                                                                               | outfile           | Optional file name to save plot on disk.                                                                                                                                                                         |
| normaliseOtherEnds      | Compute $s_i$ normalisation factors for other ends, and normalised counts.                                                                                                                                                                                                                                                                                                                                                                                    | cd                | chicagoData object                                                                                                                                                                                               |
|                         |                                                                                                                                                                                                                                                                                                                                                                                                                                                               | Ncol              | Column intData(cd) identifying counts normalised by bait (i.e. output from normaliseBaits).                                                                                                                      |
|                         |                                                                                                                                                                                                                                                                                                                                                                                                                                                               | normNcol          | Column identifying counts normalised by other ends .                                                                                                                                                             |
|                         |                                                                                                                                                                                                                                                                                                                                                                                                                                                               | plot              | Logical – if TRUE, output a diagnostic plot.                                                                                                                                                                     |
|                         |                                                                                                                                                                                                                                                                                                                                                                                                                                                               | outfile           | Optional file name to save plot on disk.                                                                                                                                                                         |
| overlapFragWithFeatures | Computes overlap between other-ends from a chicagoData object and a set of genomic features.                                                                                                                                                                                                                                                                                                                                                                  | x                 | chicagoData object or data table (data.table) containing other end IDs.                                                                                                                                          |
|                         |                                                                                                                                                                                                                                                                                                                                                                                                                                                               | folder            | Path to folder with feature files.                                                                                                                                                                               |
|                         |                                                                                                                                                                                                                                                                                                                                                                                                                                                               | list_frag         | List of feature files (e. g. H3K4me1, CTCF, DHS etc.). These files must have a bed format, with no header. Each element of the list must be named.                                                               |
|                         |                                                                                                                                                                                                                                                                                                                                                                                                                                                               | position_otherEnd | Path to file with restriction fragments coordinates and the corresponding IDs. position_otherEnd must be specified when x is not a chicagoData object.                                                           |
|                         |                                                                                                                                                                                                                                                                                                                                                                                                                                                               | sep               | Field separator character in file containing the coordinates of the restriction fragments (called by position_otherEnd).                                                                                         |
| peakEnrichment4Features | Computes how many other ends from a chicagoData object, that engage in SI, overlap with a set of genomic features. As a control, this function also samples different sets of interactions from the non-significant pool and computes their overlap with genomic features. Results are returned in a table and plotted in a barplot. Samples have the same size as the number of SI called and they follow the same distribution of bait-other end distances. | x1                | chicagoData object or data table (data.table) containing other end IDs.                                                                                                                                          |
|                         |                                                                                                                                                                                                                                                                                                                                                                                                                                                               | folder            | Path to folder with feature files.                                                                                                                                                                               |
|                         |                                                                                                                                                                                                                                                                                                                                                                                                                                                               | list_frag         | List of feature files (e. g. H3K4me1, CTCF, DHS etc.). These files must have a bed format, with no header. Each element of the list must be named.                                                               |
|                         |                                                                                                                                                                                                                                                                                                                                                                                                                                                               | no_bins           | Number of bins to divide the range of colname_dist (after colname_dist has been trimmed according to min_dist and max_dist). This determines the number of interactions sampled according to distance from bait. |

|           |                                     |                   |                                                                                                                                                        |
|-----------|-------------------------------------|-------------------|--------------------------------------------------------------------------------------------------------------------------------------------------------|
|           |                                     | sample_number     | Number of samples to be used in the permutation test. Recommended: $\geq 100$ .                                                                        |
|           |                                     | position_otherEnd | Path to file with restriction fragments coordinates and the corresponding IDs. position_otherEnd must be specified when x is not a chicagoData object. |
|           |                                     | colname_dist      | Column identifying bait-other distances. Needs to be specified if x is not a chicagoData object.                                                       |
|           |                                     | score             | score cutoff.                                                                                                                                          |
|           |                                     | colname_score     | Column identifying interaction scores.                                                                                                                 |
|           |                                     | min_dist          | Minimum bait-other end distance required. When set to NULL and trans is set to TRUE, cis interactions are discarded from the analysis.                 |
|           |                                     | max_dist          | Maximum bait-other distance required.                                                                                                                  |
|           |                                     | sep               | Field separator character in file containing the coordinates of the restriction fragments (called by position_otherEnd).                               |
|           |                                     | filterB2B         | Logical – if TRUE bait-to-bait interactions are discarded.                                                                                             |
|           |                                     | b2bcol            | Column identifying bait-to-bait interactions.                                                                                                          |
|           |                                     | unique            | Logical – if TRUE duplicated other ends are discarded.                                                                                                 |
|           |                                     | plot_name         | Optional file name to save plot on disk.                                                                                                               |
|           |                                     | trans             | Logical – if TRUE enrichment is computed for trans interactions. Additionally, if min_dist is NULL, cis interactions are discarded.                    |
|           |                                     | plotPeakDensity   | Logical – if TRUE, plot the density of interactions with distance. Only applies to cis interactions.                                                   |
| plotBaits | Plots the read counts around baits. | cd                | chicagoData object.                                                                                                                                    |
|           |                                     | pcol              | Column identifying interaction scores.                                                                                                                 |
|           |                                     | Ncol              | Column identifying counts.                                                                                                                             |
|           |                                     | n                 | Number of baits to plot.                                                                                                                               |
|           |                                     | baits             | Bait IDs to plot.                                                                                                                                      |
|           |                                     | plotBaitsNames    | Logical – if TRUE, the bait names, rather than IDs, are plotted.                                                                                       |

|               |                                                                                                         |                               |                                                                                                                                                                            |
|---------------|---------------------------------------------------------------------------------------------------------|-------------------------------|----------------------------------------------------------------------------------------------------------------------------------------------------------------------------|
|               |                                                                                                         | plotBprof                     | Logical – if TRUE, displays line with expected Brownian noise per distance.                                                                                                |
|               |                                                                                                         | plevel1, plevel2              | cutoff used on the pcol column. plevel1 should be the most stringent.                                                                                                      |
|               |                                                                                                         | outfile                       | Optional file name to save plot on disk.                                                                                                                                   |
|               |                                                                                                         | removeBait2bait               | Logical – if TRUE, bait-to-bait interactions are not plotted.                                                                                                              |
|               |                                                                                                         | width, height,                | Passed through to pdf                                                                                                                                                      |
|               |                                                                                                         | maxD                          | Maximum (linear) distance each side of the bait to plot. If NULL, include the whole chromosome.                                                                            |
|               |                                                                                                         | bgCol,<br>lev1Col,<br>lev2Col | Colours to be used for background points, and for the two stringency levels defined by plevel1 and plevel2, respectively.                                                  |
|               |                                                                                                         | bgPch,<br>lev1Pch,<br>lev2Pch | Plotting character for background points, and for points exceeding the two stringency levels defined by plevel1 and plevel2, respectively. Specified as per pch in points. |
|               |                                                                                                         | ...                           | Additional arguments passed to plot                                                                                                                                        |
| plotDistFun   | Estimates the function describing how the expected number of counts decreases with increasing distance. | cd                            | chicagoData object.                                                                                                                                                        |
|               |                                                                                                         | ...                           | Additional arguments passed to plot                                                                                                                                        |
| readAndMerge  | Wraps readSample() and mergeSamples() on multiple files.                                                | files                         | Character vector containing the locations of the files to read in.                                                                                                         |
|               |                                                                                                         | cd                            | chicagoData object.                                                                                                                                                        |
|               |                                                                                                         | ...                           | Further arguments passed to mergeSamples.                                                                                                                                  |
| readSample    | Reads input data from a file, into a chicagoData object.                                                | file                          | Path of input file.                                                                                                                                                        |
|               |                                                                                                         | cd                            | chicagoData object.                                                                                                                                                        |
| setExperiment | Creates a template CHiCAGO experiment object. This should be the first function called.                 | designDir                     | Path to design directory.                                                                                                                                                  |
|               |                                                                                                         | settings                      | Named list with settings. Overrides both settingsFile, or def.settings.                                                                                                    |
|               |                                                                                                         | settingsFile                  | Path to a settings file. One row per setting: <name> <whitespace> <value>. Overrides def.settings.                                                                         |
|               |                                                                                                         | def.settings                  | Default settings                                                                                                                                                           |

**Supplementary Table 2: Downsampled data on OSF platform for testing the CHiCAGO pipeline**

| Data Type                   | File name(s)                                                                                                                                                                                                         | File type        | Link to Directory                                         | Description                                                                                                                                                                                |
|-----------------------------|----------------------------------------------------------------------------------------------------------------------------------------------------------------------------------------------------------------------|------------------|-----------------------------------------------------------|--------------------------------------------------------------------------------------------------------------------------------------------------------------------------------------------|
| Raw CHi-C data, HaCaT cells | HaCaT_unst_rep1_CHiC_DS20M_R1.fastq.gz<br>HaCaT_unst_rep2_CHiC_DS20M_R1.fastq.gz<br>HaCaT_unst_rep2_CHiC_DS40M_R1.fastq.gz<br>HaCaT_unst_rep2_CHiC_DS40M_R2.fastq.gz                                                 | FASTQ            | <a href="https://osf.io/kmfj4/">https://osf.io/kmfj4/</a> | Raw data for testing alignment (e.g. HiCUP)                                                                                                                                                |
| Raw CHi-C data, MyLa cells  | MyLa_rep1_CHiC_DS20M_R1.fastq.gz<br>MyLa_rep1_CHiC_DS20M_R2.fastq.gz<br>MyLa_rep2_CHiC_DS20M_R1.fastq.gz<br>MyLa_rep2_CHiC_DS20M_R2.fastq.gz                                                                         | FASTQ            | <a href="https://osf.io/xm9an/">https://osf.io/xm9an/</a> | Raw data for testing alignment (e.g. HiCUP)                                                                                                                                                |
| CHi-C BAM files, HaCaT      | HaCaT_unst_rep1_CHiC_DS20M_R1_2.hicup.bam<br>HaCaT_unst_rep2_CHiC_DS40M_R1_2.hicup.bam                                                                                                                               | BAM              | <a href="https://osf.io/q8qcm/">https://osf.io/q8qcm/</a> | Aligned and filtered CHi-C reads. Can be used to test bam2chicago.sh                                                                                                                       |
| CHi-C BAM files, MyLa       | MyLa_rep1_CHiC_DS20M_R1_2.hicup.bam<br>MyLa_rep2_CHiC_DS20M_R1_2.hicup.bam                                                                                                                                           | BAM              | <a href="https://osf.io/hq4zi/">https://osf.io/hq4zi/</a> | Aligned and filtered CHi-C reads. Can be used to test bam2chicago.sh                                                                                                                       |
| CHiCAGO input files, HaCaT  | HaCaT_unst_rep1_CHiC_DS20M_HindIII_GWAS_sharedChr.chinput<br>HaCaT_unst_rep2_CHiC_DS40M_HindIII_GWAS_sharedChr.chinput                                                                                               | Chinput          | <a href="https://osf.io/wsc69/">https://osf.io/wsc69/</a> | Chinput files for testing full CHiCAGO pipeline                                                                                                                                            |
| CHiCAGO input files, MyLa   | MyLa_rep1_CHiC_DS20M_HindIII_GWAS_sharedChr.chinput<br>MyLa_rep2_CHiC_DS20M_HindIII_GWAS_sharedChr.chinput                                                                                                           | Chinput          | <a href="https://osf.io/wsc69/">https://osf.io/wsc69/</a> | Chinput files for testing full CHiCAGO pipeline                                                                                                                                            |
| CHiCAGO Design files        | GRCh37_HindIII_sharedChr.rmap<br>HindIII_GWAS_sharedChr.baitmap                                                                                                                                                      | rmap;<br>baitmap | <a href="https://osf.io/sx7fu/">https://osf.io/sx7fu/</a> | Design files accompanying the CHi-C data; used to make the npbp, npb and poe files that are required for the CHiCAGO pipeline                                                              |
| CHiCAGO data files, HaCaT   | HaCaT_rep1_DS20M_HindIII_GWAS_sharedChr.Rds<br>HaCaT_rep2_DS40M_HindIII_GWAS_sharedChr.Rds<br>HaCaT_DS_reps_HindIII_GWAS_sharedChr.Rds                                                                               | Rds              | <a href="https://osf.io/b9p3v/">https://osf.io/b9p3v/</a> | CHiCAGO output for individual replicates (rep1, rep2) or for both replicates processed together (reps). Can be used to test CHiCAGO functions.                                             |
| CHiCAGO data files, MyLa    | MyLa_rep1_DS20M_HindIII_GWAS_sharedChr.Rds<br>MyLa_rep2_DS20M_HindIII_GWAS_sharedChr.Rds<br>MyLa_DS_reps_HindIII_GWAS_sharedChr.Rds                                                                                  | Rds              | <a href="https://osf.io/b9p3v/">https://osf.io/b9p3v/</a> | CHiCAGO output for individual replicates (rep1, rep2) or for both replicates processed together (reps). Can be used to test CHiCAGO functions.                                             |
| Feature files               | all_feat.txt<br>E047_CD8_H3K27ac_hg19.bed<br>E047_CD8_H3K27me3_hg19.bed<br>E047_CD8_H3K4me1_hg19.bed<br>ENCFF151HKM_NHEK_H3K27me3_hg19.bed<br>ENCFF898SZF_NHEK_H3K4me1_hg19.bed<br>ENCFF943CBQ_NHEK_H3K27ac_hg19.bed | txt;<br>bed      | <a href="https://osf.io/aitpv/">https://osf.io/aitpv/</a> | Histone modifications from ENCODE (NHEK) or Roadmap (CD8) to test for feature enrichment against HaCaT and MyLa, respectively. Accompanying all_feat.txt specifies file names of features. |
